# Supplementary material for: AIM2-Like Receptors Positively and Negatively Regulate the Interferon Response Induced by Cytosolic DNA
Source: PubMed Central journal article supplement (PMC5573678; doi:10.1128/mbio.00944-17), 2017-07-05
Supplement: mbo003173364sf2.pdf [file mbo003173364sf2.pdf]

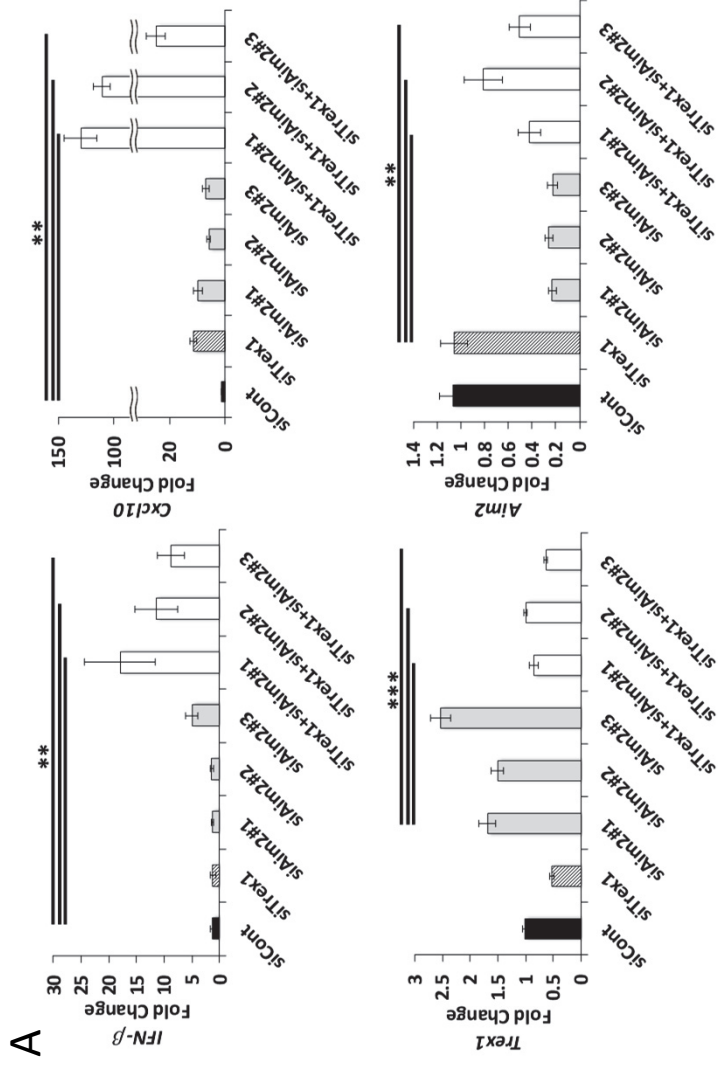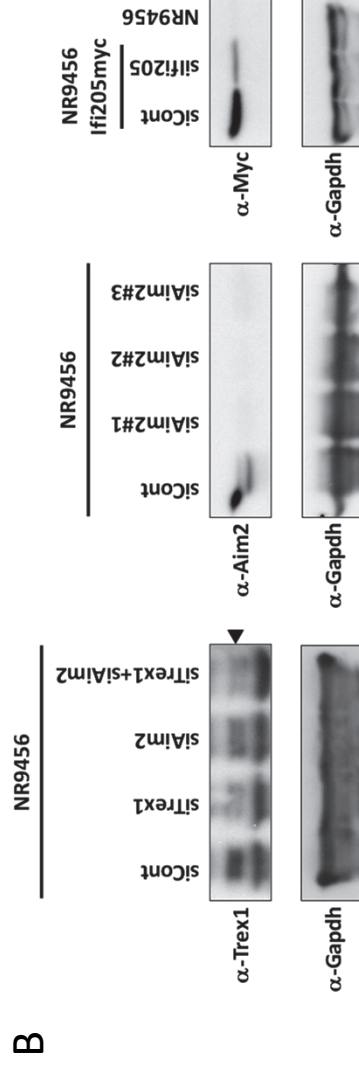

**Fig. S2.** The effect of siAim2 in IFN response was not off-target. A) NR9456 cells were transfected with the indicated siRNAs and expression levels of *IFN-β*, *Cxcl10*, *Trex1* and *Aim2* measured by RT-qPCR. Values were normalized to *Gapdh* and are shown as mean  $\pm$  SEM of three experiments. \*  $p < 0.05$ , \*\*  $p < 0.005$  and \*\*\*  $p < 0.0005$  (two-tailed t-test). B) Knockdown effects of each siRNA in macrophages. NR9456 or NR9456-IFI205myc cells were transfected with indicated siRNAs. TREX1, AIM2 and IFI205myc were detected by the indicated antibodies in western blotting. Western blotting for TREX1, IFI205myc and AIM2 were performed 1, 1 and 2 times, respectively.
