# Supplementary material for: AIM2-Like Receptors Positively and Negatively Regulate the Interferon Response Induced by Cytosolic DNA
Source: PubMed Central journal article supplement (PMC5573678; doi:10.1128/mbio.00944-17), 2017-07-05
Supplement: mbo003173364sf5.pdf [file mbo003173364sf5.pdf]

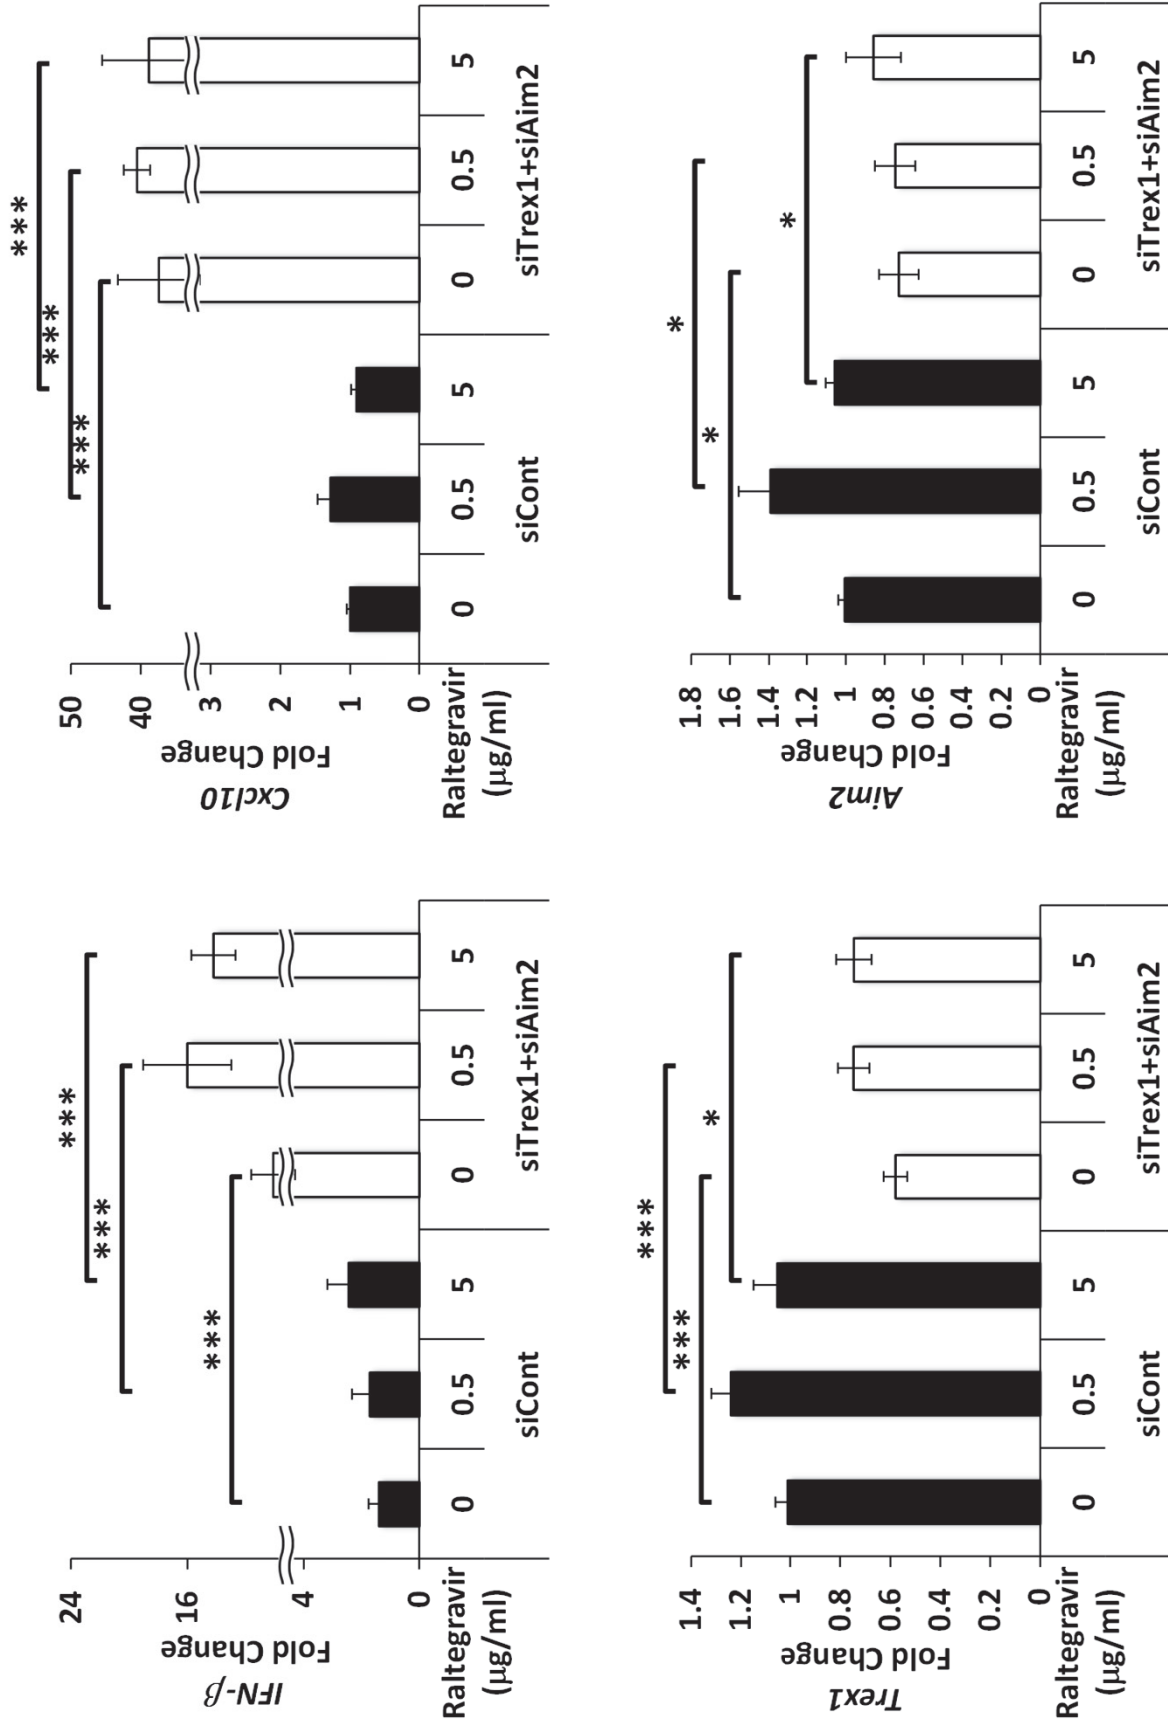

**Fig. S5.** Raltegravir does not increase the type I IFN response in macrophages. NR9456 cells treated with raltegravir at the different concentration (0, 0.5, 5 mg/ml) were sequentially transfected with indicated siRNAs. Expression levels of IFN- $\beta$ , Cxcl10, Trex1 and Aim2 were measured by RT-qPCR. Values were normalized to *Gapdh* and are shown as mean  $\pm$  SEM of three experiments in triplicate. \* $P < 0.05$  and \*\*\* $P < 0.0005$  (two-tailed t-test).
