# Supplementary material for: AIM2-Like Receptors Positively and Negatively Regulate the Interferon Response Induced by Cytosolic DNA
Source: PubMed Central journal article supplement (PMC5573678; doi:10.1128/mbio.00944-17), 2017-07-05
Supplement: mbo003173364sf6.pdf [file mbo003173364sf6.pdf]

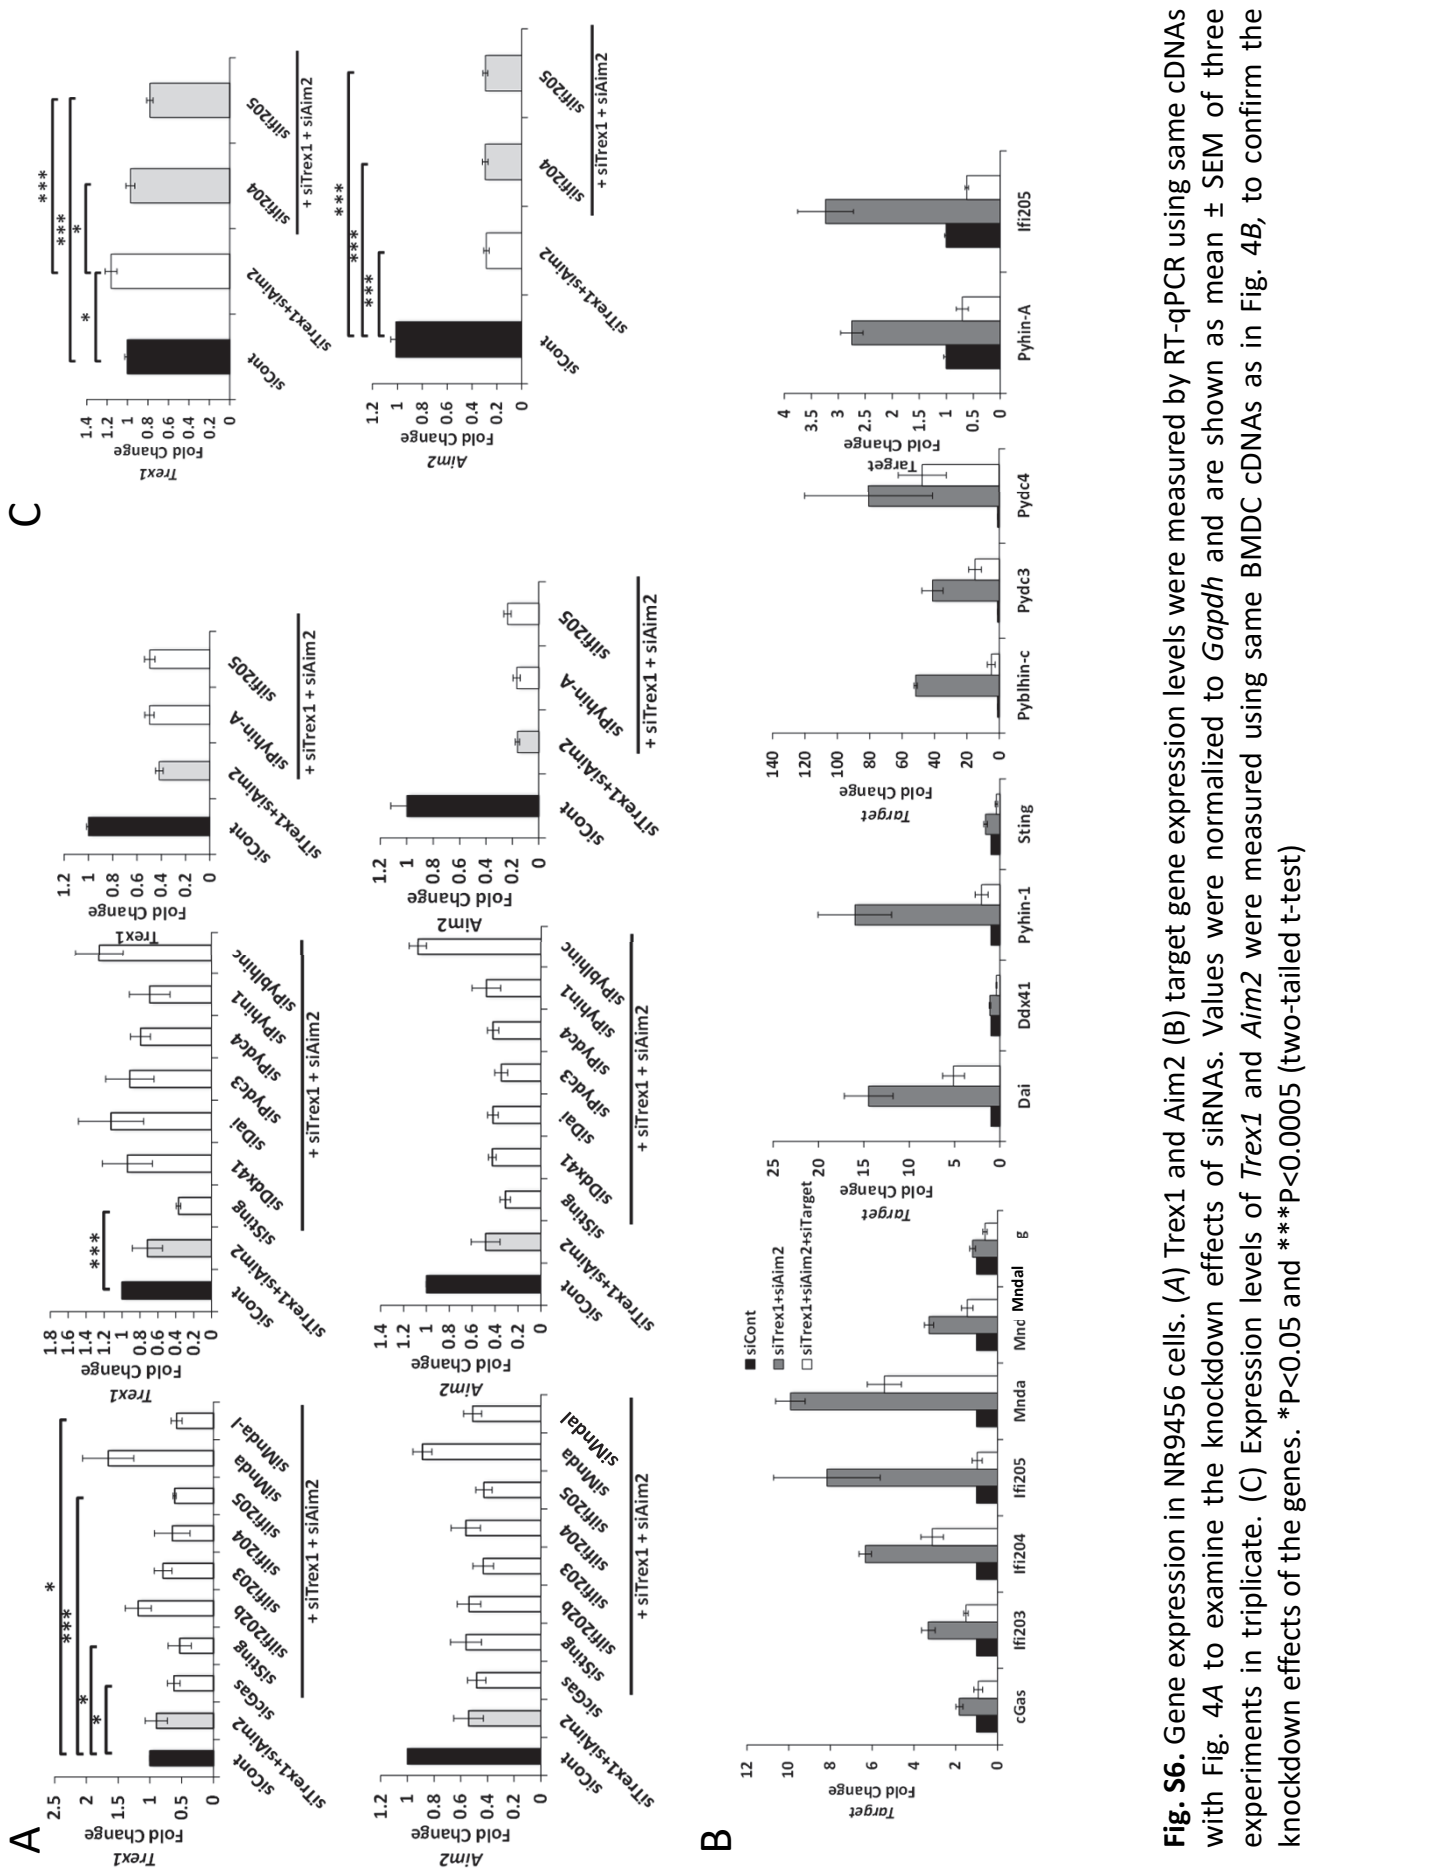

**Fig. S6.** Gene expression in NR9456 cells. (A) *Trex1* and *Aim2* (B) target gene expression levels were measured by RT-qPCR using same cDNAs with Fig. 4A to examine the knockdown effects of siRNAs. Values were normalized to *Gapdh* and are shown as mean  $\pm$  SEM of three experiments in triplicate. (C) Expression levels of *Trex1* and *Aim2* were measured using same BMDC cDNAs as in Fig. 4B, to confirm the knockdown effects of the genes. \* $P < 0.05$  and \*\*\* $P < 0.0005$  (two-tailed t-test)
